# Supplementary material for: Improving the robustness of a catalyzed hairpin assembly with a three-arm nanostructure for nonenzymatic signal amplification
Source: Royal Society of Chemistry journal article supplement (doi:10.1039/d2an00209d), 2022-01-01
Supplement: d2an00209d1.pdf [file d2an00209d1.pdf]

## Supplementary information

### **Improving robustness of catalyzed hairpin assembly with three-arm nanostructure for nonenzymatic signal amplification**

Eunjoo Kim<sup>1,†</sup>, Jiaxin Xu<sup>1,†</sup>,<sup>1</sup> Jinah Kim<sup>1</sup>, and Honggu Chun<sup>1,2 \*</sup>

<sup>1</sup>Department of Biomedical Engineering, Korea University, Hana Science Hall, 145 Anamro,  
Seongbukgu, Seoul 02841, Korea

<sup>2</sup>Institute of Precision Public Health, Korea University, Hana Science Hall, 145 Anamro,  
Seongbukgu, Seoul 02841, Korea

† These authors contributed equally.

\* Corresponding author: *E-mail address*: [chunhonggu@korea.ac.kr](mailto:chunhonggu@korea.ac.kr)

**Table S1. Sequences of oligonucleotides used in this work**

| Oligonucleotides <sup>a,b</sup>                | 5'-Sequences-3' <sup>c</sup>                                                       |
|------------------------------------------------|------------------------------------------------------------------------------------|
| Catalyst <sub>24</sub> (C <sub>24</sub> )      | GCAACA-CAG-AACTCG-TCG-ACTCCA                                                       |
| Catalyst <sub>30</sub> (C <sub>30</sub> )      | CTACAG-CAATTC-ACCATC-CTTAGC-ACTTCG                                                 |
| Catalyst <sub>original</sub> (C <sub>o</sub> ) | GCACTA-CTCCCT-AACATC-TCAAGC                                                        |
| H1 <sub>24</sub>                               | TGGAGT-CGA-CGAGTT-CTG-TGTTGC-ACT-CCACCA-<br>GCAACA-CAG-AACTCG-TCG                  |
| H2 <sub>24</sub>                               | CGAGTT-CTG-TGTTGC-TGG-TGGAGT-AAC-TCGTGC-<br>ACTCCA-CCA-GCAACA-CAG                  |
| H3 <sub>24</sub>                               | TGTTGC-TGG-TGGAGT-CGA-CGAGTT-GCA-ACACAG-<br>AACTCG-TCG-ACTCCA-CCA                  |
| H3_FAM <sub>24</sub>                           | /5IABkFQ/TGTTGC-TGG-TGGAGT-CGA-CGAGTT-GCA-<br>ACACAG-AACTCG-TCG-ACTCCA-CCA/36-FAM/ |
| H1 <sub>30</sub>                               | CGAAGT-GCTAAG-GATGGT-GAATTG-GTGTAG-<br>ACTTCG-GCTACA-CTACAC-CAATTC-ACCATC-CTTAGC   |
| H2 <sub>30</sub>                               | GATGGT-GAATTG-GTGTAG-TGTAGC-CGAAGT-<br>ACCATC-CTTAGC-ACTTCG-GCTACA-CTACAC-CAATTC   |
| H3 <sub>30</sub>                               | GTGTAG-TGTAGC-CGAAGT-GCTAAG-GATGGT-<br>CTACAC-CAATTC-ACCATC-CTTAGC-ACTTCG-GCTACA   |
| H1 <sub>o</sub>                                | GCTTGA-GATGTT-AGGGAG-TAGTGC-TCCAAT-<br>CACAAAC-GCACTA-CTCCCT-AACATC                |
| H2 <sub>o</sub>                                | AGGGAG-TAGTGC-GTTGTG-ATTGGA-AACATC-<br>TCAAGC-TCCAAT-CACAAAC-GCACTA                |
| H3 <sub>o</sub>                                | GTTGTG-ATTGGA-GCTTGA-GATGTT-GCACTA-CTCCCT-<br>AACATC-TCAAGC-TCCAAT                 |
| Single-base substitution at toehold            | GCAACA-CAG-AACTCG-TCG-AC <b>C</b> CCA                                              |
| Single-base substitution at stem               | GCAACA-CAG-AA <b>A</b> TCG-TCG-ACTCCA                                              |
| Single-base deletion                           | GCAACA-CAG-AA_ <u>  </u> TCG-TCG-ACTCCA                                            |

### Single-base insertion

GCAACA-CAG-AAACTCG-TCG-ACTCCA

---

<sup>a</sup> Subscript <sub>0</sub>: sequences of original 3-arm nanostructure<sup>1</sup>, <sub>24</sub>: circuit targeting 24 nt DNA, <sub>30</sub>: circuit targeting 30 nt DNA.

<sup>b</sup> MTC: mismatched at toehold catalyst, MSC: mismatched at stem catalyst, DC: deleted catalyst, IC: inserted catalyst.

<sup>c</sup> The red portions represent the mutated bases in catalyst DNA., The underline represents deleted base.

**Table S2. Probability of minimum free energy structure formation and free energy of secondary structure of selected sequences**

| <b>Oligonucleotides</b> | <b>Free energy of secondary structure (kcal/mol)</b> | <b>Probability</b> |
|-------------------------|------------------------------------------------------|--------------------|
| C <sub>24</sub>         | 0                                                    | 0.126              |
| C <sub>30</sub>         | 0.8                                                  | 0.385              |
| C <sub>o</sub>          | 0                                                    | 0.387              |
| H1 <sub>24</sub>        | -27.48                                               | 0.947              |
| H2 <sub>24</sub>        | -26.72                                               | 0.521              |
| H3 <sub>24</sub>        | -26.41                                               | 0.277              |
| H1 <sub>30</sub>        | -33.88                                               | 0.705              |
| H2 <sub>30</sub>        | -34.16                                               | 0.524              |
| H3 <sub>30</sub>        | -34.64                                               | 0.424              |
| H1 <sub>o</sub>         | -24.13                                               | 0.845              |
| H2 <sub>o</sub>         | -24.75                                               | 0.415              |
| H3 <sub>o</sub>         | -23.59                                               | 0.473              |

All simulations were executed with 1 M Na<sup>+</sup> at 25 °C under default setting of NUPACK.

**Table S3. The calculated reactivity (%) between catalyst and targeted hairpin and between two hairpins for 3-CHA-24**

|                        | <b>H1<sub>24</sub></b> | <b>H2<sub>24</sub></b> | <b>H3<sub>24</sub></b> |
|------------------------|------------------------|------------------------|------------------------|
| <b>H1<sub>24</sub></b> | 0                      | 0.18                   | 0.60                   |
| <b>H2<sub>24</sub></b> | 0.18                   | 0                      | 0.50                   |
| <b>H3<sub>24</sub></b> | 0.60                   | 0.50                   | 0                      |
| <b>C<sub>24</sub></b>  | 92.3                   | -                      | -                      |

All simulations were executed with 1 M Na<sup>+</sup> at 25 °C under default setting of NUPACK.

**Table S4. Comparison of signal to background ratio with other approaches**

| Method <sup>a</sup>                          | Advantage                                     | Limitation                    | F/F <sub>0</sub> ratio <sup>b, c</sup> | Ref          |
|----------------------------------------------|-----------------------------------------------|-------------------------------|----------------------------------------|--------------|
| Enzyme-free nucleic acid amplified detection | Improved signal                               | Background noise              | < 3.2 (500 nM C)                       | <sup>2</sup> |
| HSC                                          | Real-time, minimized noise                    | Low sensitivity               | 6.1 (250 nM C)                         | <sup>3</sup> |
| CHA                                          | High sensitivity and specificity              | Complex sequence design       | 3 (100 pM C)                           | <sup>4</sup> |
| CHA cascade                                  | Detailed kinetic analysis                     | Lack of practical data        | 8 (5 nM C)                             | <sup>5</sup> |
| ISDPR                                        | High sensitivity, low background noise        | Extra graphene oxide addition | < 3 (5 nM C)                           | <sup>6</sup> |
| Translator-mediated CHA                      | Sensitive colorimetric detection              | Long reaction time            | < 2.5 (500 nM C)                       | <sup>7</sup> |
| TB-CHA                                       | Multisite fluorescence                        | MoS <sub>2</sub> addition     | < 7.5 (150 nM C)                       | <sup>8</sup> |
| 3-CHA                                        | Simple, suppressed leakage, improve S/B ratio | Lower sensitivity             | 8.9 (100 nM C)<br>7.9 (500 nM C)       | This work    |

<sup>a</sup>. HSC: hairpin stacking circuit; ISDPR: isothermal strand-displacement polymerase reaction; CHA: catalyzed hairpin assembly; TB-CHA: three-branched catalyzed hairpin assembly

<sup>b</sup>. F/F<sub>0</sub> ratio: signal-to-background ratio

<sup>c</sup>. C: catalyst

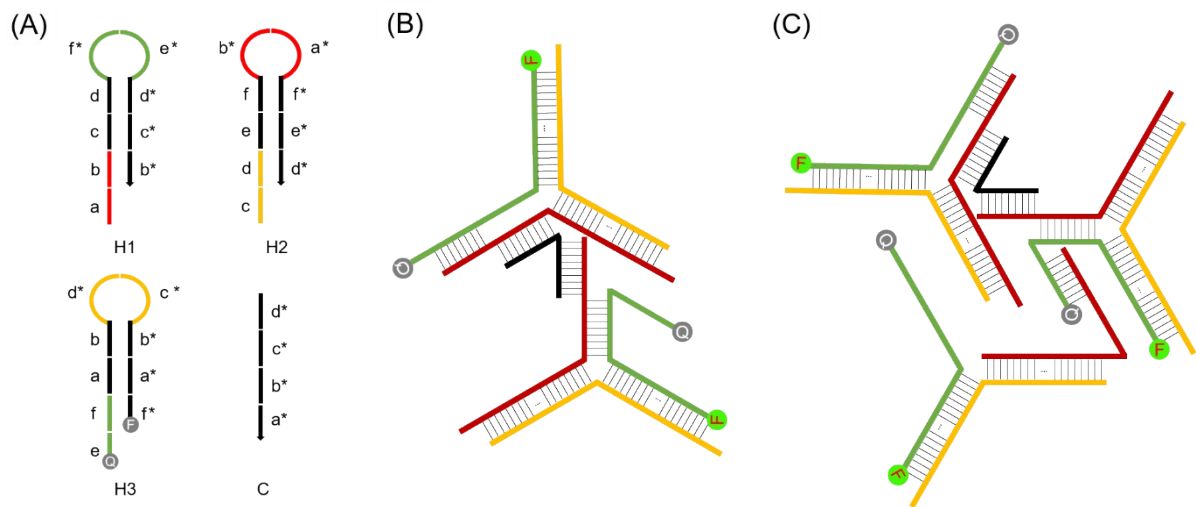

**Figure S1.** Domain organization of the original 3-arm nanostructure<sup>1</sup>. The color shows possible reaction sites due to disclosed ssDNA form which can induce spontaneous hybridization among hairpin DNAs. (B) (C) Possible multimeric forms of the amplified product, resulting the bands between 300 bp to 1000 bp in Figure 2 and Figure S2.

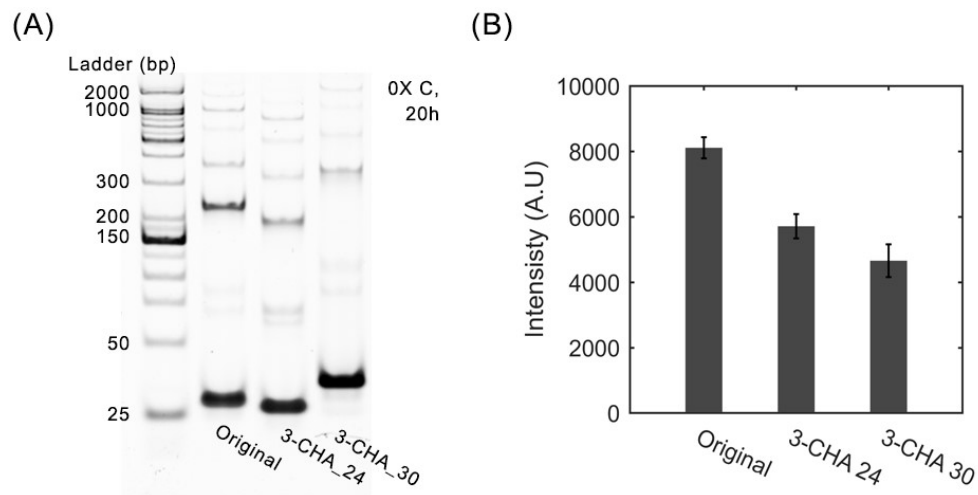

**Figure S2.** Assembly reaction in absence of catalyst of different 3-CHA circuits after 20 h incubation. (A) Comparison of different circuits by gel electrophoresis. (B) False-positive or leakage reaction.

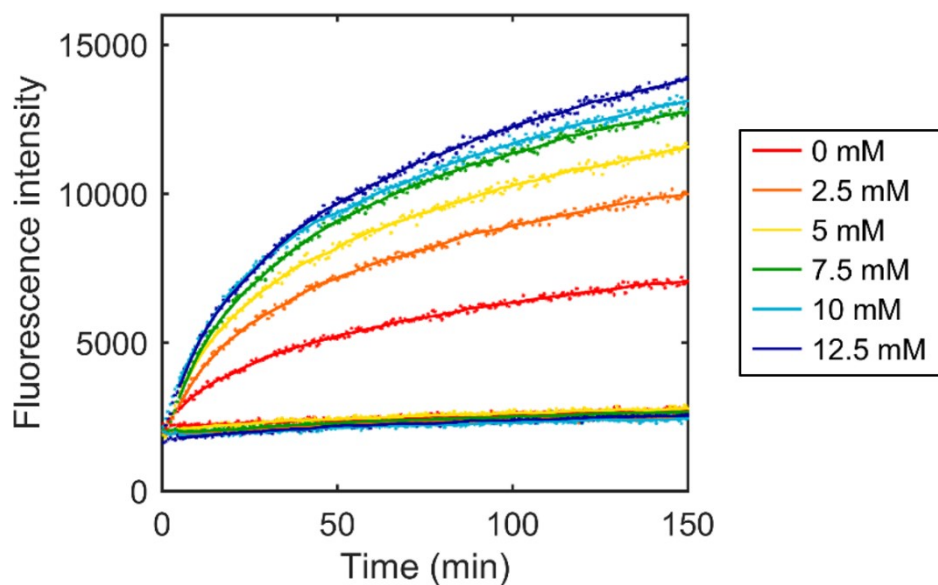

**Figure S3.** Time-coursed fluorescence depending on different concentration of  $\text{Mg}^{2+}$  in reaction buffer. Dots and lines represent collected data and digitally processed data, respectively.

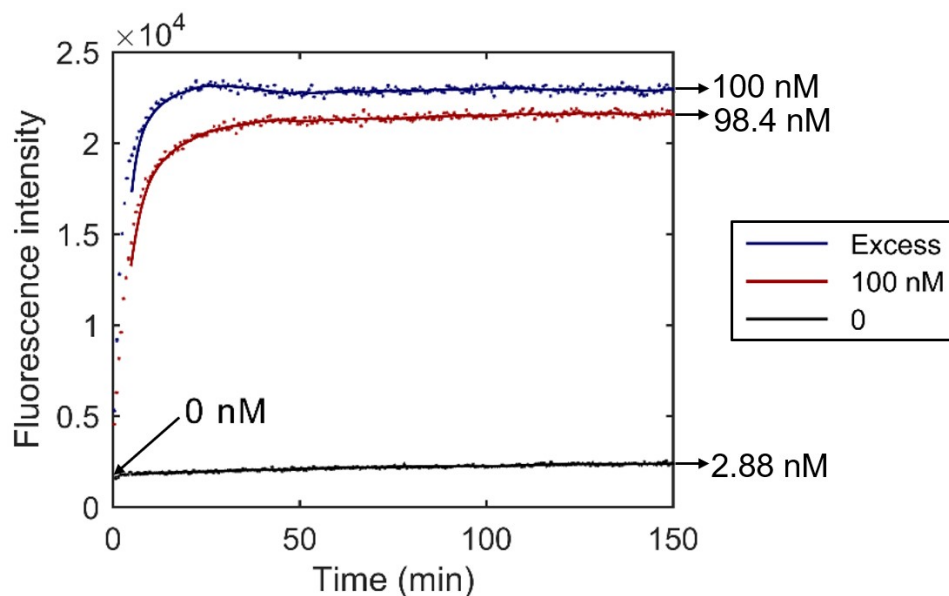

**Figure S4.** Control experiment for converting fluorescence intensity to concentration of product. Excess: 250 nM H1 + 250 nM H2 + 100 nM H3 + 100 nM C, 100 nM: 100 nM H1 + 100 nM H2 + 100 nM H3 + 100 nM C, 0: 100 nM H1 + 100 nM H2 + 100 nM H3 + 0 C, Dots and lines represent collected data and digitally processed data, respectively.



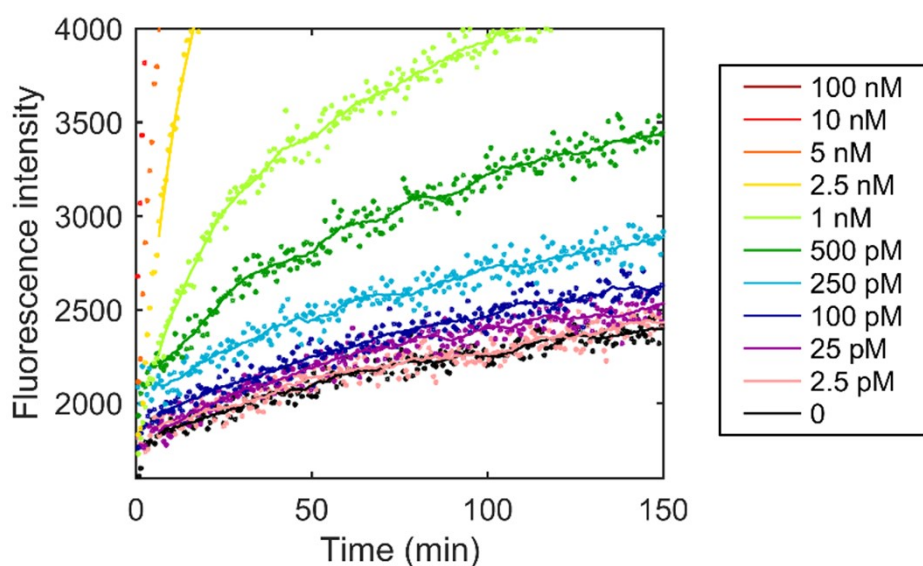

**Figure S5.** Time-coursed fluorescence of 3-CHA<sub>24</sub> depending on different concentration C, especially for low concentration. Dots and lines represent collected data and digitally processed data, respectively.

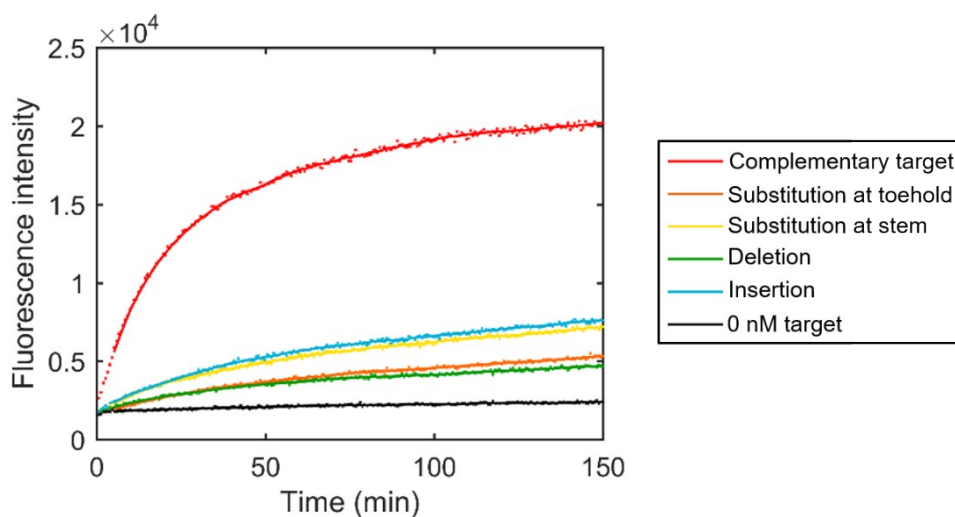

**Figure S6.** Signal amplification of 3-CHA<sub>24</sub> with perfectly complementary catalyst and SNPs. Catalytic reaction rate was significantly reduced with SNPs, showing selectivity of the 3-CHA. Dots and lines represent collected data and digitally processed data, respectively.

## Reference

- 1 P. Yin, H. M. Choi, C. R. Calvert and N. A. Pierce, *Nature*, 2008, **451**, 318-322.
- 2 Z. Qing, X. He, J. Huang, K. Wang, Z. Zou, T. Qing, Z. Mao, H. Shi and D. He, *Anal. Chem.*, 2014, **86**, 4934-4939.
- 3 Y. Xing, X. Li, T. Yuan, W. Cheng, D. Li, T. Yu, X. Ding and S. Ding, *Analyst*, 2017, **142**, 4834-4842.
- 4 D. Li, W. Cheng, Y. Li, Y. Xu, X. Li, Y. Yin, H. Ju and S. J. A. c. Ding, *Anal. Chem.*, 2016, **88**, 7500-7506.
- 5 X. Chen, N. Briggs, J. R. McLain and A. D. Ellington, *Proc. Natl. Acad. Sci. U.S.A.*, 2013, **110**, 5386-5391.
- 6 H. Dong, J. Zhang, H. Ju, H. Lu, S. Wang, S. Jin, K. Hao, H. Du and X. Zhang, *Anal. Chem.*, 2012, **84**, 4587-4593.
- 7 E. Hosseinzadeh, H. Ravan, A. Mohammadi, R. Mohammad-Rezaei, A. Norouzi and H. Hosseinzadeh, *Biosens. Bioelectron.*, 2018, **117**, 567-574.
- 8 D. Zhu, J. Huang, B. Lu, Y. Zhu, Y. Wei, Q. Zhang, X. Guo, L. Yuwen, S. Su, J. Chao and L. Wang, *ACS Appl. Mater. Interfaces*, 2019, **11**, 20725-20733.
